# Supplementary material
Source: publisher figshare collection journal article supplement (https://geolsoc.figshare.com/ndownloader/files/25778054)

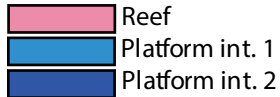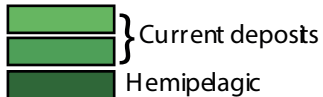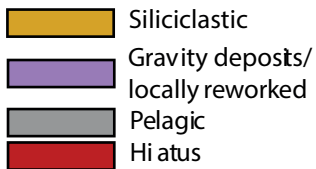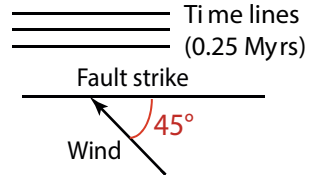

Model Run 63: land attached

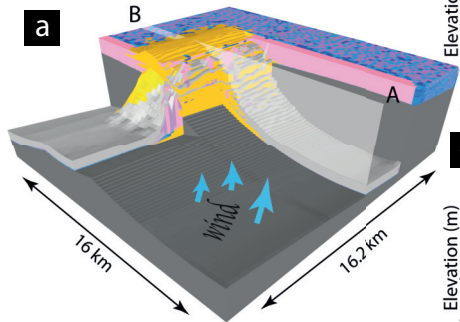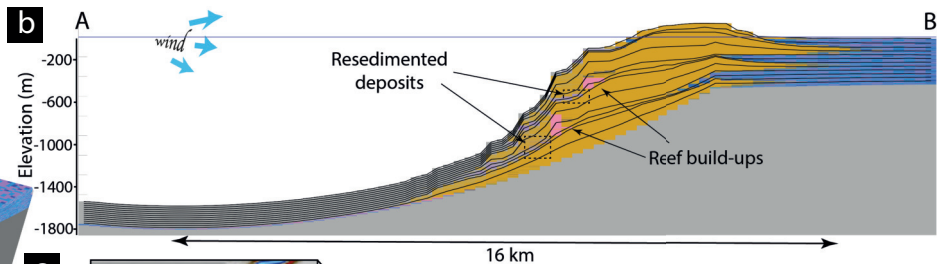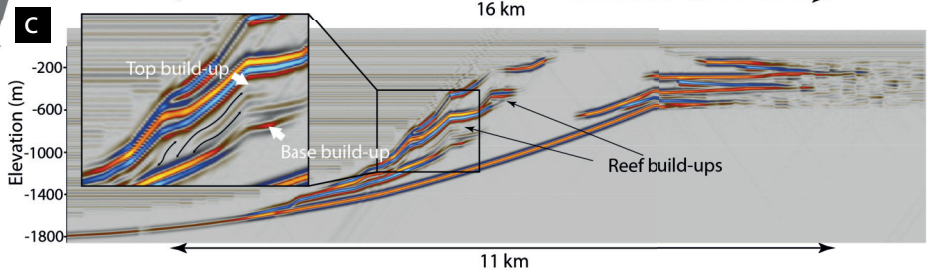

Supplement: Supplementary file 1 [file 25778054]
